# Supplementary material for: The role of sulfur oxidation in controlling the electronic properties of sulfur-containing host molecules for phosphorescent organic light-emitting diodes
Source: Royal Society of Chemistry journal article supplement (doi:10.1039/c7cp00828g), 2017-01-01
Supplement: c7cp00828g1.pdf [file c7cp00828g1.pdf]

# Role of Sulfur Oxidation in Controlling Electronic Properties of the Sulfur-Containing Host Molecules for Phosphorescent Organic Light-Emitting Diodes

*E. Varathan<sup>1,2</sup> and V. Subramanian<sup>1,2\*</sup>*

*CSIR-Network of Institutes for Solar Energy*

<sup>1</sup>*Chemical laboratory, CSIR-Central Leather Research Institute, Adyar, Chennai-600 020*

<sup>2</sup>*Academy of Scientific and Innovative Research (AcSIR), New Delhi 110025, India*

E-mail: subuchem@hotmail.com, [subbu@clri.res.in](mailto:subbu@clri.res.in).

Tel.: +91 44 24411630. Fax: +91 44 24911589.

## Supporting Information

(4 pages including this page)

**Figure S1:** Optimized geometries of host molecules along with some selected dihedral angles.

**Figure S2:** Optimized geometries of 3, 7-substituted host along with some selected dihedral angles

**Figure S3:** Calculated and experimental triplet energy ( $E_T$ ) of hosts **1**, **4**, and **7** in B3LYP/6-31+G\* method.

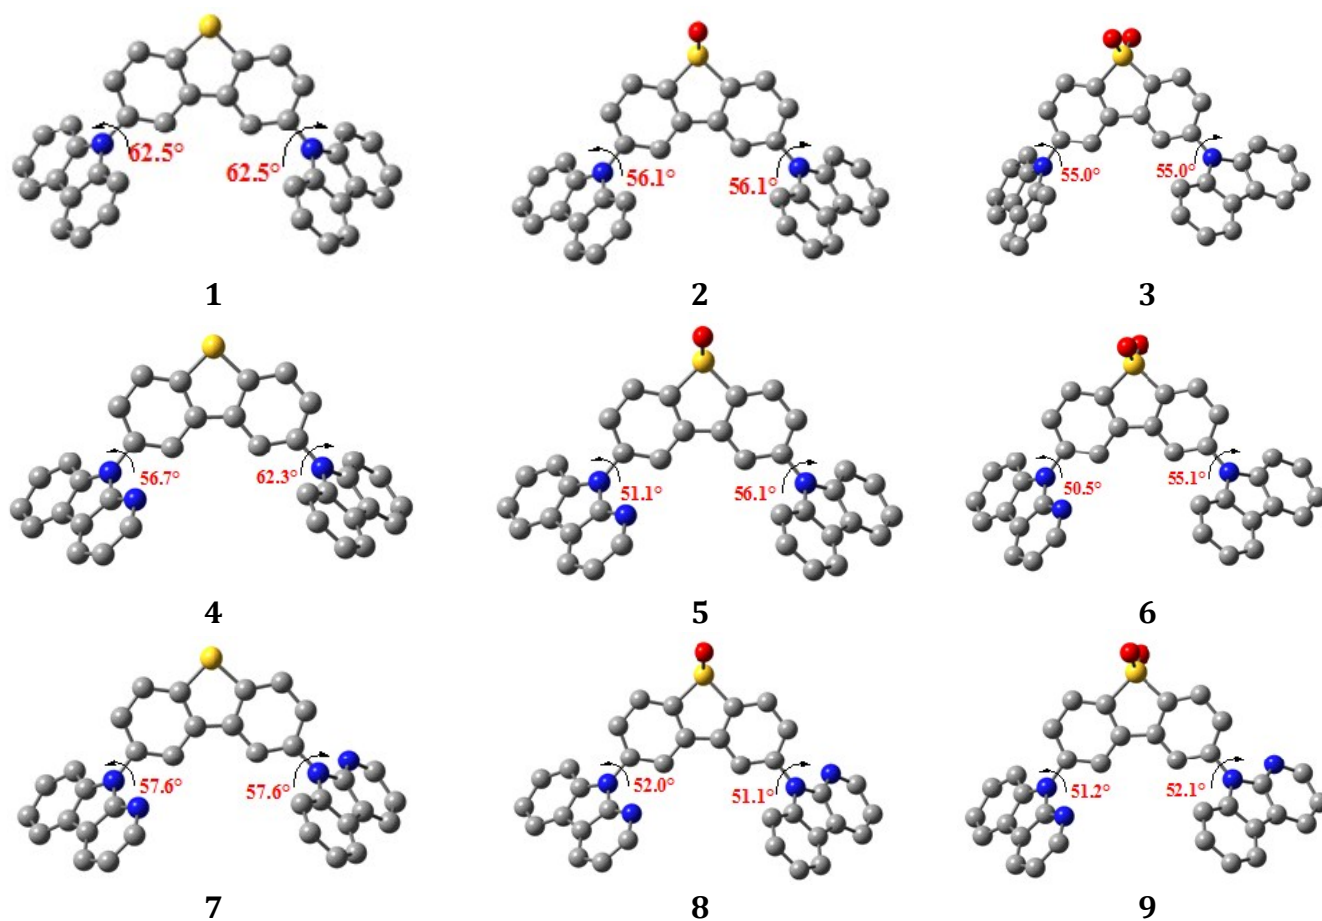

**Figure S1:** Optimized geometries of host molecules along with some selected dihedral angles.

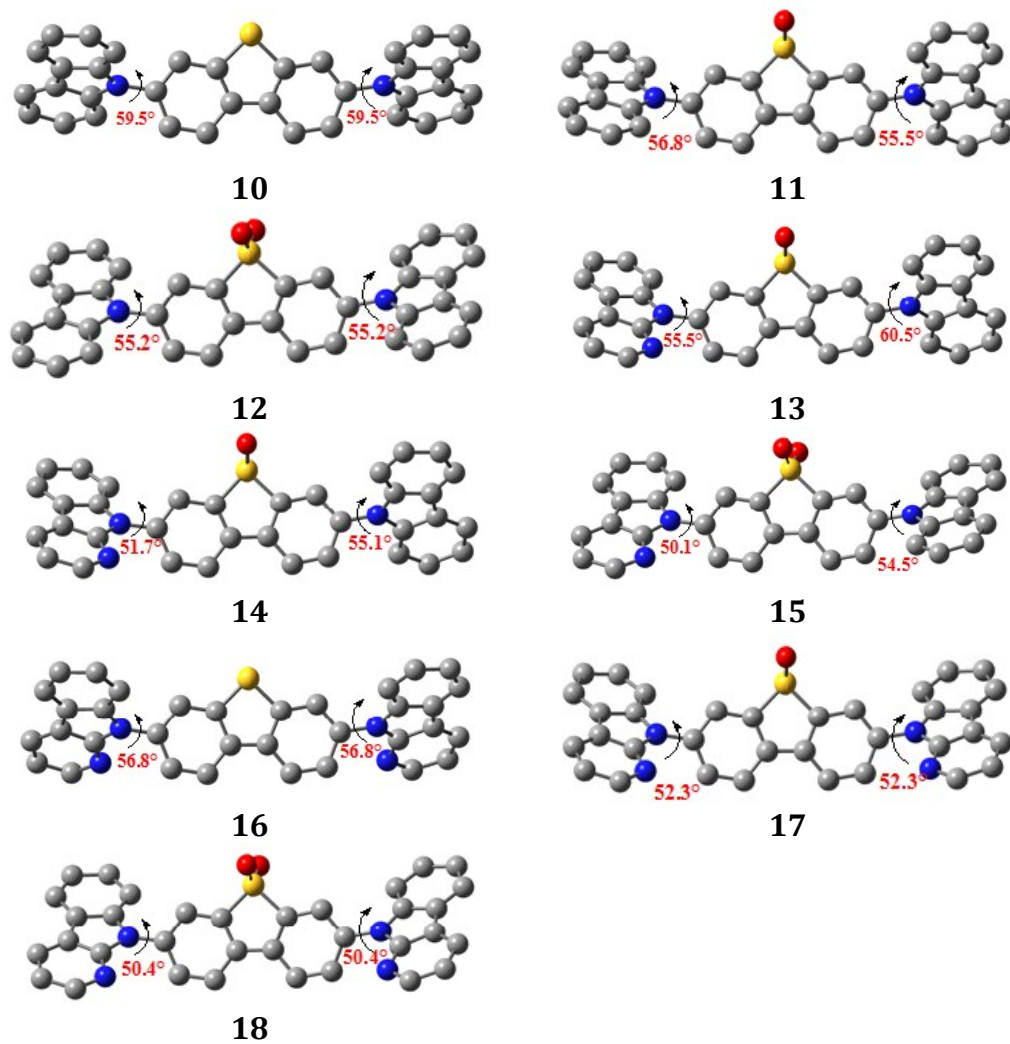

**Figure S2:** Optimized geometries of 3, 7-substituted host along with some selected dihedral angles.

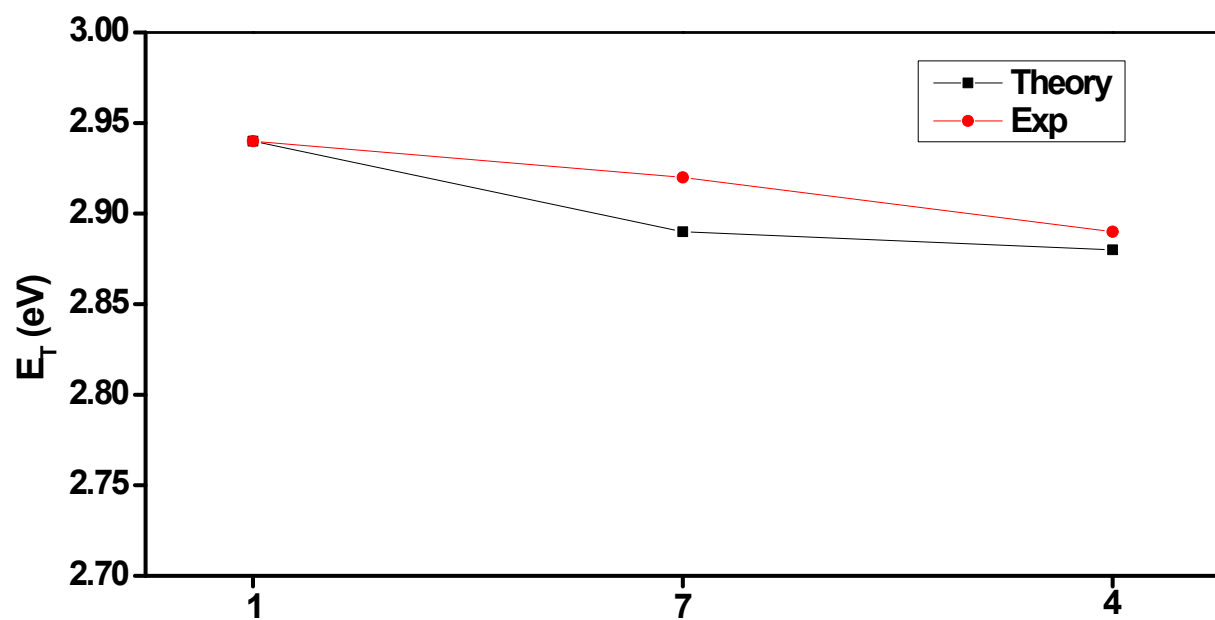

**Figure S3:** Calculated and experimental triplet energy ( $E_T$ ) of hosts **1**, **4**, and **7** in B3LYP/6-31+G\* method.
